# Supplementary material
Source: Springer Nature journal article supplement (https://www.springerprofessional.de/resource/supplementary/13638_2012_544_MOESM14_ESM.pdf/11898030)

Phase values MATLAB and Fixed Point Output

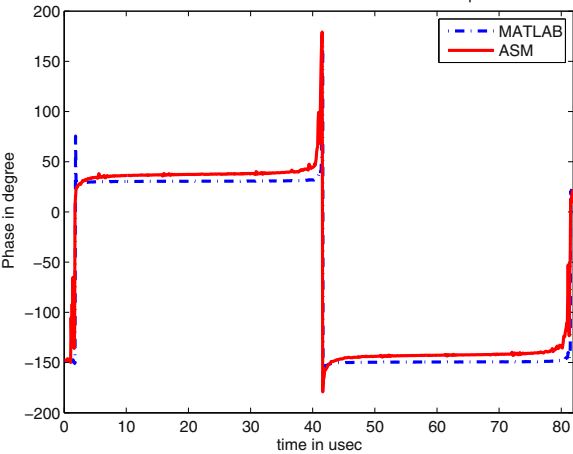

Supplement: MOESM14 [file 11898030]
